# Supplementary material for: The effect on income of providing near vision correction to workers in Bangladesh: The THRIVE (Tradespeople and Hand-workers Rural Initiative for a Vision-enhanced Economy) randomized controlled trial
Source: PubMed Central journal article supplement (PMC10990163; doi:10.1371/journal.pone.0296115), 2024-04-03
Supplement: pone.0296115.s002.pdf [file pone.0296115.s002.pdf]

**Question** Can provision of free reading glasses for presbyopia correction increase the income of various visually-demanding occupations in Bangladesh?

**Findings** This individual randomized controlled trial of 824 participants showed that participants in the intervention group were significantly (OR 1.38, 95% CI 1.06, 1.78, P= 0.015) more likely to have greater gains in self-reported income compared with controls 8 months after receiving spectacles.

**Meaning** Provision of reading glasses has potential as a poverty-alleviation strategy in this setting.

**Registry** [ClinicalTrial.gov](https://clinicaltrials.gov)

**Study Registration Number** NCT03719196
