# Supplementary material for: The effect on income of providing near vision correction to workers in Bangladesh: The THRIVE (Tradespeople and Hand-workers Rural Initiative for a Vision-enhanced Economy) randomized controlled trial
Source: PubMed Central journal article supplement (PMC10990163; doi:10.1371/journal.pone.0296115), 2024-04-03
Supplement: pone.0296115.s003.pdf [file pone.0296115.s003.pdf]

**OCCUPATION CATEGORIES**

| <b>Occupation types</b>                                               | <b>Visually demanding categories</b> | <b>Frequency</b> |
|-----------------------------------------------------------------------|--------------------------------------|------------------|
| Carpenter/Bamboo, Cottage products maker/tube well maker/packet maker | Most visually demanding              | 41               |
| Electrician/Mechanic/welding work                                     | Most visually demanding              | 7                |
| Garment, tailor, weaver, handicrafts worker, bags, mats               | Most visually demanding              | 297              |
| Goldsmith worker/Remittance/Barber/Kumar                              | Most visually demanding              | 17               |
| Government/medical & paramedical/teacher/tutors/NGOs                  | Most visually demanding              | 8                |
| Works at shop                                                         | Most visually demanding              | 80               |
| Agriculture, and animal husbandry                                     | Moderate visually demanding          | 253              |
| Businessman/Hawker                                                    | Moderate visually demanding          | 18               |
| Driver-Bus/Truck/Taxi/Passenger vehicle/Boatman                       | Moderate visually demanding          | 29               |
| Private job                                                           | Moderate visually demanding          | 10               |
| Motor car mechanic/mason/soil clipper/other industrial laborer        | Moderate visually demanding          | 39               |
| Painter                                                               | Moderate visually demanding          | 2                |
| Daily wage labor                                                      | Least visually demanding             | 15               |
| Maid                                                                  | Least visually demanding             | 5                |
| Land leased out                                                       | Least visually demanding             | 1                |
| Old age pension/widow pension/aid for the disadvantaged               | Least visually demanding             | 2                |
| <b>Total</b>                                                          |                                      | <b>824</b>       |
